# Supplementary material for: Broad spectrum developmental role of Brachypodium AUX1
Source: PubMed Central journal article supplement (PMC6100110; doi:10.1111/nph.15332), 2018-06-27

## **New Phytologist Supporting Information**

Article title: **Broad spectrum developmental role of Brachypodium AUX1**

Authors: Alja van der Schuren, Catalin Voiniciuc, Jennifer Bragg, Karin Ljung, John Vogel, Markus Pauly & Christian S. Hardtke

Article acceptance date: 10 June 2018

The following Supporting Information is available for this article:

**Fig. S1 Clustal protein sequence alignment of Arabidopsis and Brachypodium AUX1 homologs.**

**Fig. S2 Expression analysis of Brachypodium *BdAUX1* and other *AUX1* homologs.**

**Fig. S3 Various genetic and physiological analyses of Brachypodium *BdAUX1*.**

**Fig. S1 Clustal protein sequence alignment of Arabidopsis and Brachypodium AUX1 homologs.**

MView result of multiple sequence alignment. Sequence identities were calculated based on reference sequence AtAUX1 and normalized by aligned length. Amino acids were colored by identity.

**Fig. S2 Expression analysis of Brachypodium *BdAUX1* and other *AUX1* homologs. (A)** RT-PCR amplification of *BdAUX1* mRNA from wild type and *Bdaux1* mutant background. Different parts of the *BdAUX1* mRNA were amplified using the indicated oligonucleotide pairs. The ca. 600 bp band amplified with oligonucleotides F1 and R1 (middle) corresponded to an apparently unrelated cross-hybridizing artefact (*Bd1g74510*) as determined by Sanger sequencing. The full length cDNA could not be amplified from *Bdaux1* (right) and only produced a small fragment containing 306 bp of exon 7 (as determined by Sanger sequencing), indicating rearrangement of the *BdAUX1* locus by the T-DNA insertion. **(B)** qPCR of the two *BdAUX1* homologs in Bd21-3 and *Bdaux1* roots, relative expression normalized to housekeeping gene *BdUBC18* (error bars = SE). Statistically significant difference compared to wild type is indicated (Student's T-test,  $\alpha = p < 0.01$ ).

**Fig. S3 Various genetic and physiological analyses of *Brachypodium BdAUX1*.** **(A)** Primary root length of two *Arabidopsis aux1* mutants as compared to their wild type background Col-0. **(B-C)** Shoot phenotype of indicated complemented and mutant lines. **(D)** Inflorescence phenotype of a homozygous *Bdaux1* mutant created through CRISPR/Cas9 genome editing. **(E)** Monosaccharide analysis of wall material of 1 cm root elongation zone segments (2-day-old roots) of indicated genotypes (error bars = SE). **(F)** Shoot phenotype of indicated genotypes. **(G)** Root length of indicated genotypes. **(H)** Quantification of total cell file number in cross sections of mature tissue layers of indicated genotypes (2-day-old roots). **(I-J)** Root meristems of indicated genotypes (confocal microscopy after ClearSee and calcofluor staining), including parental background controls (I), 2-day-old roots. Statistically significant differences are indicated: (A, E): Student's T-test, a =  $p < 0.01$ ; b =  $p < 0.02$ ; (G-H): ANOVA ( $p < 0.001$ ) & Tukey test, alpha = 0.01. (I-J): composite images.

Figure S1

Reference sequence (1): AtAUX1-AT2G38120 Identities normalised by aligned length. Colored by: identity

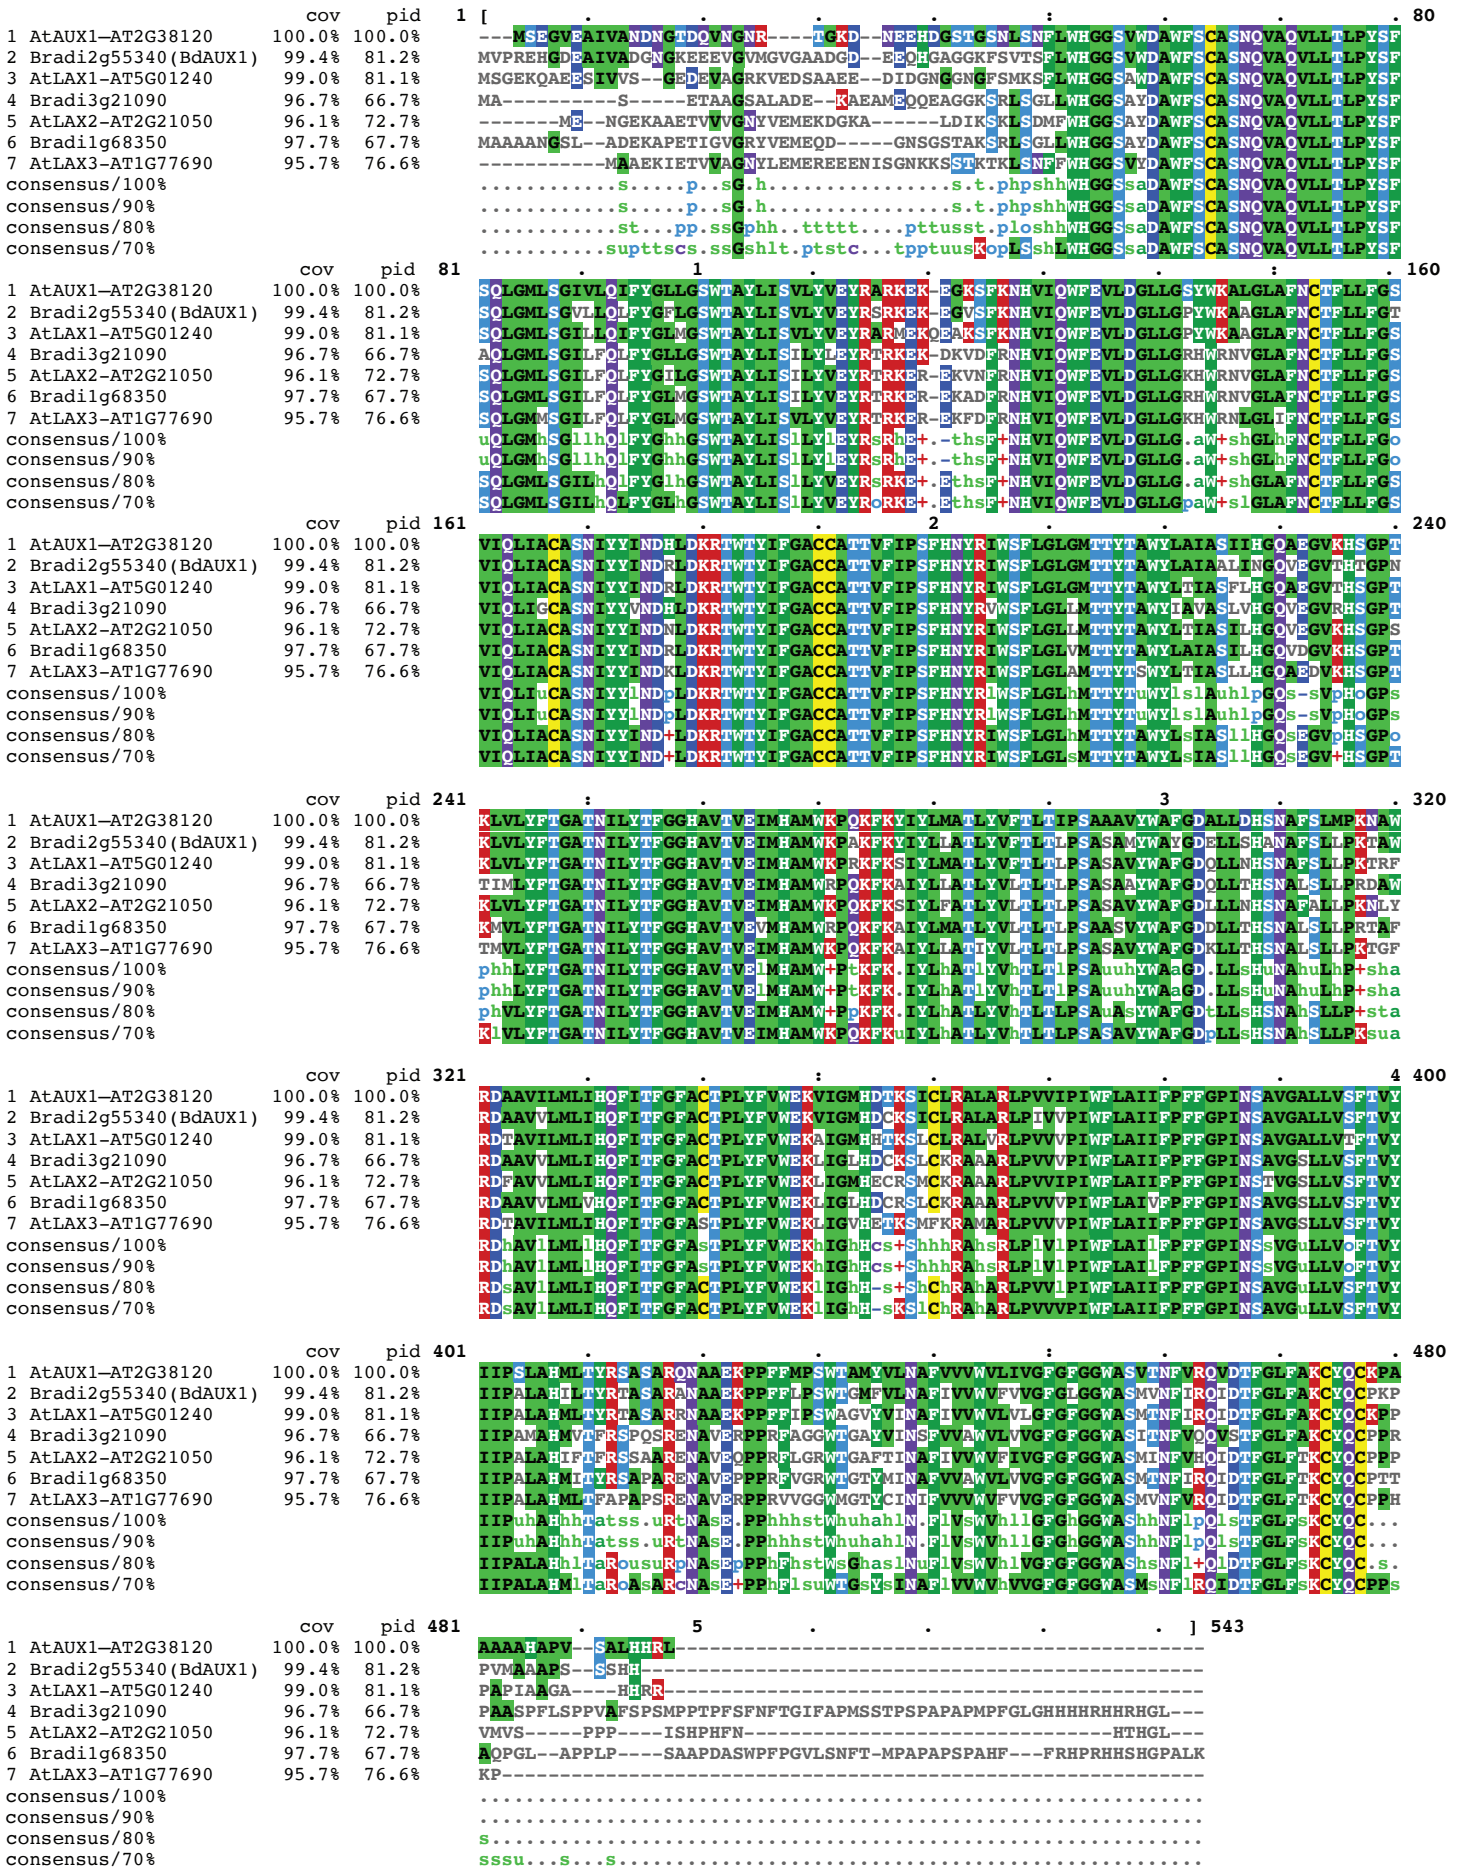

Figure S2

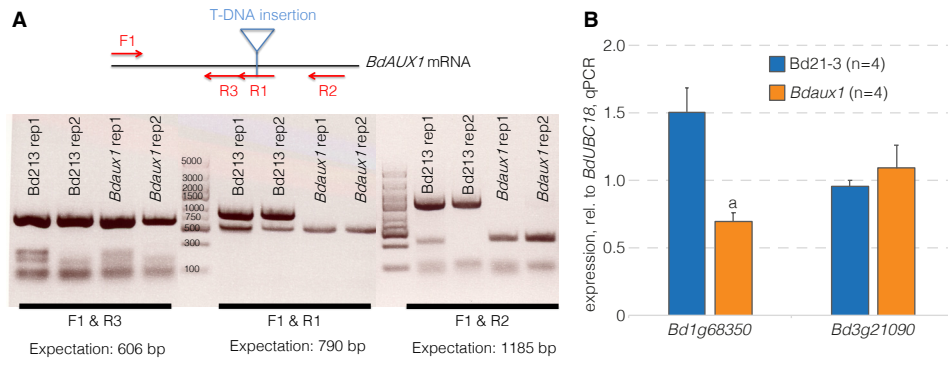

Figure S3

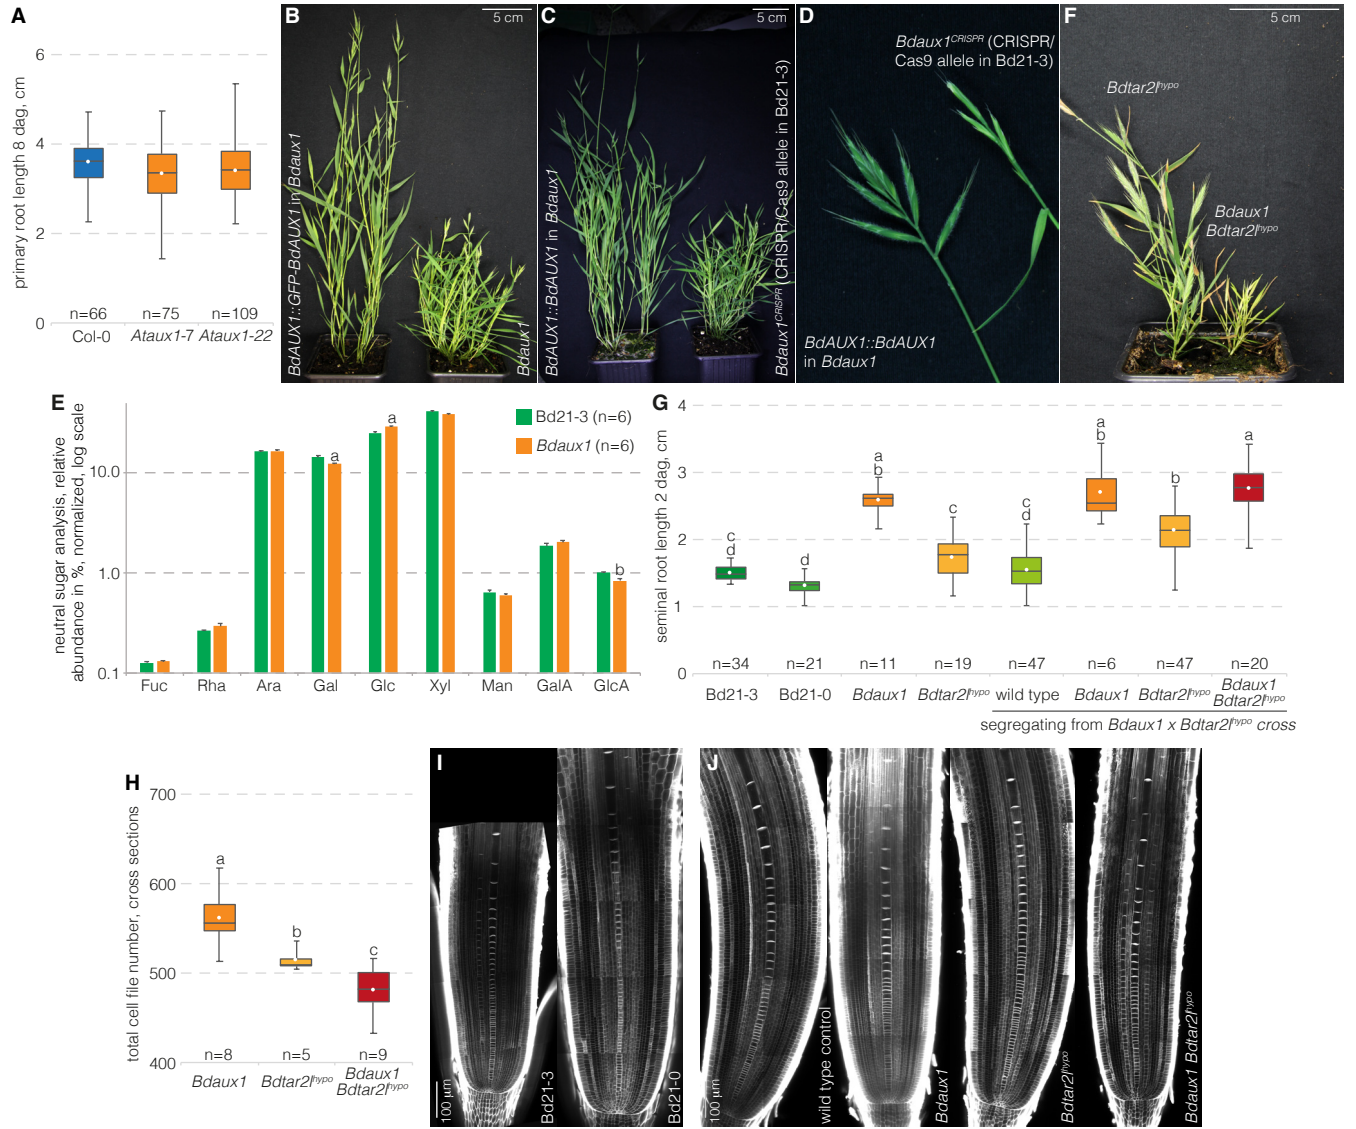

Supplement: NPH-219-1216-s001.pdf [file NPH-219-1216-s001.pdf]
