# Supplementary material for: Broad spectrum developmental role of Brachypodium AUX1
Source: PubMed Central journal article supplement (PMC6100110; doi:10.1111/nph.15332), 2018-06-27
Supplement: NPH-219-1216-s004.pdf [file NPH-219-1216-s004.pdf]

**New Phytologist Supporting Information**

Article title: **Broad spectrum developmental role of Brachypodium AUX1**

Authors: Alja van der Schuren, Catalin Voiniciuc, Jennifer Bragg, Karin Ljung, John Vogel, Markus Pauly & Christian S. Hardtke

Article acceptance date: 10 June 2018

**Supporting Information Methods S1 - DNA and oligonucleotide sequences**

Cas9 cassette: **FLAG-tag NLS Bd-optimized Cas9**

TATGGTACCATGATGATCGAC**TACAAGGACGACGACGACAAG**ATGGCCCCG**AAGAAGAAGCGCAAG**GTGGGC**ATGGACAAGAAGTA**  
**CTCCATCGGCCTCGACATCGGCACGAACTCCGTGGGCTGGGCCGTGATCACGGACGAGTACAAGGTGCCGTCCAAGAAGTTCAAGG**  
**TGCTCGGCAACACGGACCGCCACTCCATCAAGAAGAACCTCATCGGGCCCTCCTCTCGACTCCGGCGAGACGGCCGAGGCCACG**  
**CGCCTCAAGCGCACGGCCCGCCCGCTACACGCGCCGAAGAACCGCATCTGCTACCTCCAGGAGATCTTCTCCAACGAGATGGC**  
**CAAGGTGGACGACTCCTTCTCCACCGCCTCGAGGAGTCTTCTCGTGGAGGAGACAAGAAGCACGAGCGCCACCCGATCTTCG**  
**GCAACATCGTGGACGAGGTGGCCTACCACGAGAAGTACCCGACGATCTACCACCTCCGCAAGAAGCTCGTGGACTCCACGGACAAG**  
**GCCGACCTCCGCTCATCTACCTCGCCCTCGCCACATGATCAAGTTCGCGGCCACTTCCTCATCGAGGGCGACCTCAACCCGGA**  
**CAACTCCGACGTGGACAAGCTTTCATCCAGCTCGTGCAGACGTACAACCAGCTCTTCGAGGAGAACCCGATCAACGCCTCCGGCG**  
**TGGACGCCAAGGCCATCCTCTCCGCCCGCCTCTCCAAGTCCCGCCGCTCGAGAACCTCATCGCCAGCTCCCGGGCGAGAAGAAG**  
**AACGGCTCTTCGGCAACCTCATCGCCCTCTCCCTCGGCCTCACGCCGAACCTCAAGTCCAACCTTCGACCTCGCCGAGGACGCCAA**  
**GCTCCAGCTCTCCAAGGACACGTACGACGACGACCTCGACAACCTCCTCGCCAGATCGGGCAGCAGTACGCCGACCTCTTCCTCG**  
**CCGCCAAGAACCTCTCCGACGCCATCCTCCTCCGACATCCTCCGCGTGAACACGGAGATCACGAAGGCCCGCTCTCCGCCTCC**  
**ATGATCAAGCGCTACGACGAGCACCACCAGGACCTCACGCTCCTCAAGGCCCTCGTGCGCCAGCAGCTCCCGGAGAAGTACAAGGA**  
**GATCTTCTTCGACCAAGTCCAAGAACGGCTACGCCGCTACATCGACGGCGGCCCTCCAGGAGGAGTTCTACAAGTTCATCAAGC**  
**CGATCTTCGAGAAGATGGACGGCACGGAGGAGCTCTCGTGAAGTCAACCGCGAGGACCTCCTCCGCAAGCAGCGCAGTTCGAC**  
**AACGGCTCCATCCCGCACCAGATCCACCTCGGCGAGCTCCACGCCATCCTCCGCCGCCAGGAGGACTTCTACCCGTTCTCAAGGA**  
**CAACCGGAGAAGATCGAGAAGATCCTCACGTTCCGCATCCCGTACTACGTGGGCCGCTCGCCCGGGCAACTCCCGCTTCGCCT**  
**GGATGACCGCAAGTCCGAGGAGACGATCACGCCGTGGAACCTTCGAGGAGGTGGTGGACAAGGGCGCCTCCGCCAGTCTTCATC**  
**GAGCGCATGACGAACCTTCGACAAGAACCTCCCGAACGAGAAGGTGCTCCCGAACACTCCCTCCTTACGAGTACTTCACGGTGTG**  
**CAACGAGCTCACGAAGGTGAAGTACGTGACGAGGGCATGCGCAAGCCGGCCTTCTCTCCGGCGAGCAGAAGAAGGCCATCGTGG**  
**ACCTCCTTCAAGACGAACCGCAAGGTGACGGTGAAGCAGCTCAAGGAGGACTACTTCAAGAAGATCGAGTGCTTCGACTCCGTG**  
**GAGATCTCCGGCGTGGAGGACCGCTTCAACGCCCTCCTCGGCAGTACCACGACCTCCTCAAGATCATCAAGGACAAGGACTTCCT**  
**CGACAACGAGGAGAACGAGGACATCCTCGAGGACATCGTGCTCACGCTCACGCTCTTCGAGGACCGGAGATGATCGAGGAGCGCC**  
**TCAAGACGTACGCCACCTCTTCGACGACAAGGTGATGAAGCAGCTCAAGCGCCGCGCTACACGGGCTGGGGCCGCTCTCCCGC**  
**AAGTTCATCAACGGCATCCGCGACAAGCAGTCCGGCAAGACGATCCTCGACTTCTCAAGTCCGACGGCTTCGCCAACCGCAACTT**  
**CATGCAGCTCATCCACGACGACTCCCTCACGTTCAAGGAGGACATCCAGAAGGCCAGGTGTCCGGCCAGGGCGACTCCCTCCACG**  
**AGCACATCGCCAACCTCGCCGGCTCCCGGCCATCAAGAAGGGCATCCTCCAGACGGTGAAGGTGGTGGACGAGCTCGTGAAGGTG**  
**ATGGGCCGCCACAAGCCGGAGAACATCGTGATCGAGATGGCCCGGAGAACCAGACGACGCAGAAGGGCCAGAAGAAGTCCCGCGA**  
**GCGCATGAAGCGCATCGAGGAGGGCATCAAGGAGCTCGGCTCCAGATCCTCAAGGAGCACCCGTTGGAGAAACGCAGCTCCAGAA**  
**CGAGAAGCTTACTCTACTACCTCCAGAACGGCCGACATGTACGTGGACCAGGAGCTCGACATCAACCGCCTCTCCGACTACG**  
**ACGTGGACCACATCGTCCCGCAGTCTTCTCAAGGACGACTCCTTCGACAACAAGGTGCTCACGCGCTCCGACAAGAACCAGCGCC**  
**AAGTCCGACAACGTGCCGTCCGGGAGGTGGTGAAGAAGATGAAGAAGTACTGGCGCCAGCTCCTCAACGCCAAGCTCATCACGCAG**  
**CGCAAGTTCGACAACCTCACGAAGCCGAGCGCGCCGCTCTCCGAGCTCGACAAGGCCGGCTTCATCAAGCGCCAGCTCGTGGAA**  
**GACGCGCCAGATCACGAAGCACGTGGCCAGATCCTCGACTCCCGCATGAACACGAAGTACGACGAGAACGACAAGCTCATCCGCC**

AGGTGAAGGTGATCACGCTCAAGTCCAAGCTCGTGTCCGACTTCCGCAAGGACTTCCAGTTCTACAAGGTGCGCGAGATCAACAAC  
TACCACCACGCCACGACGCCTACCTCAACGCCGTGGTGGCAGCGCCCTCATCAAGAAGTACCCGAAGCTCGAGTCCGAGTTCGT  
GTACGGCGACTACAAGGTGTACGACGTGCGCAAGATGATCGCCAAGTCCGAGCAGGAGATCGGCAAGGCCACGGCCAAGTACTTCT  
TCTACTCCAACATCATGAACCTTCTCAAGACGGAGATCACGCTCGCCAACGGCGAGATCCGCAAGCGCCCGCTCATCGAGACGAAC  
GGCGAGACGGGCGAGATCGTGTGGGACAAGGGCCGCGACTTCGCCACGGTGCGCAAGGTGCTCTCCATGCCGCAGGTGAACATCGT  
GAAGAAGACGGAGGTGCAGACGGGCGGCTTCTCCAAGGAGTCCATCTCCCGAAGCGCAACTCCGACAAGCTCATCGCCCGCAAGA  
AGGACTGGGACCCGAAGAAGTACGGCGGCTTCGACTCCCCGACGGTGGCCTACTCCGTGCTCGTGGTGGCCAAGGTGGAGAAGGGC  
AAGTCCAAGAAGCTCAAGTCCGTGAAGGAGCTCCTCGGCATCACGATCATGGAGCGCTCCTCCTTCGAGAAGAACCCGATCGACTT  
CCTCGAGGCCAAGGGTACAAGGAGGTGAAGAAGGACCTCATCATCAAGCTCCCGAAGTACTCCCTCTTCGAGCTCGAGAACGGCC  
GCAAGCGCATGCTCGCTCCGCCGGGAGCTCCAGAAGGGCAACGAGCTCGCCCTCCCGTCCAAGTACGTGAACCTCTCTACCTC  
GCCTCCCACTACGAGAAGCTCAAGGGCTCCCGGAGGACAACGAGCAGAAGCAGCTCTTCGTGGAGCAGCACAAGCACTACCTCGA  
CGAGATCATCGAGCAGATCTCCGAGTCTCCAAGCGGTGATCTCGCCGACGCCAACCTCGACAAGGTGCTCTCCGCCTACAACA  
AGCACCGCGACAAGCCGATCCGCGAGCAGGCCGAGAACATCATCCACCTCTTCACGCTCACGAACCTCGGCGCCCCGGCCGCCTTC  
AAGTACTTCGACACGACGATCGACCGCAAGCGCTACACGTCCACGAAGGAGGTGCTCGACGCCACGCTCATCCACCAGTCCATCAC  
GGGCCTCTACGAGACGCGCATCGACCTCTCCAGCTCGGCGGGCGACTAGCTGCTTTAATGAGATATGCGAGACGCCATGATCGCA  
TGATATTTGCTTTCAATTCTGTTGTGCACGTTGTAAAAACCTGAGCATGTGTAGCTCAGATCCTTACCGCCGGTTTCGGTTCATTC  
TAATGAATATATACCCGTTACTATCGTATTTTTATGAATAATATCTCCGTTCAATTTACTGATGTACCCTACTACTTATATGT  
ACAATATTTAAAATGAAAACAATATATTTGTGCTGAATAGGTTTATAGCGACATCTATGATAGAGCGCCACAATAACAAAACAATTGCC  
TTTTATTATTACAAATCCAATTTTCGGGGATCCTCTAGAGTGCACCTGCAGGCATGCAAGCTTGGCACGGTTACCAAGCGCGCAA

**BdAUX1 k.o. sgRNA cassette: *BdU6 promoter* *tracrRNA* *OsU6 promoter* *BsaI* or *BtgZI* sites**

AAAGGATCCGGCGCGCCCTACTTGGGCTGTTGCTCTCTACTGGGTTGGGCCGCATGGACTGACACAGGCCACGCGGGTCTCTTAC  
GAGCCTGGGGCTGGCCTGATCCGATGGTGTGCTGATCAAGGCAACAGGCTAGAAAGTTAGTCCCACCTCGCGAGATGAAGGATAGT  
TTGACTAGATTATAAACATTCTGCTACCACCCTTCTGagagaccgagctcggctctcaGTTTTAGAGCTAGAAATAGCAAGTTAAAA  
TAAGGCTAGTCCGTTATCAACTTGAAAAAGTGGCACCGAGTCGGTGTCTTTTTTTGAGATTTCCAACCAGGTCCCTGGAGCCCAT  
GTCTAGTAACGGCCCGCAGTGTGCTGGAATTGCCCTTGATCATGAACCAACGGCCTGGCTGTATTTGGTGGTGTGTAGGGAGAT  
GGGGAGAAGAAAAGCCGATTCTCTTCTGTGATGGCTGGATGCATGCGGGGGAGCGGGAGGCCAAGTACGTGCACGGTGAGCG  
GCCCCACAGGGCGAGTGTGAGCGCGAGAGGCGGGAGGAACAGTTTACTACCACATTGCCAGCTAACTCGAACCGGACCAACTTATA  
AACCCGCGCGCTGTGCTTGTGTacaattgcatcatcgagtcagcgatgagtagacagcaaGTTTTAGAGCTAGAAATAGCAAGTTA  
AAATAAGGCTAGTCCGTTATCAACTTGAAAAAGTGGCACCGAGTCGGTGTCTTTTTTTGAGATTTTGCACCCGGTCTGCAGGGTC  
AAGCTTAAA

**List of primers:**

|                     |                                                         |
|---------------------|---------------------------------------------------------|
| pUbil-For           | 5'-GAG CTC CAG CTT GCA TGC CTG CAG TG-3'                |
| pUbil-Rev           | 5'-GAG CTC TCT AGA GTC GAC CTG CAG AA-3'                |
| sgRNA-BdAux1a F2    | 5'-TCT CGT CAC CAG CTT CCT CTG GCA-3'                   |
| sgRNA-BdAux1a R     | 5'-AAA CTG CCA GAG GAA GCT GGT GAC-3'                   |
| sgRNA-BdAux1b F     | 5'-GTG TGA TCC GGT AGT TGT GGA AGG-3'                   |
| sgRNA-BdAux1b R     | 5'-AAA CCC TTC CAC AAC TAC CGG ATC-3'                   |
| BdAUX1L-WT-F        | 5'-GTG AAC TTT CCA CAC TGA GC-3'                        |
| BdAUX1L-WT-R        | 5'-TCA CAA GAG CTG GGC AAT GG-3'                        |
| pJJ2LBA-RB-F2       | 5'-CAG GAA TTC ATG CCG ACA GC-3'                        |
| KanR-XhoI-For       | 5'-CCA CTC GAG GAT CTC CAC TCT AGT CGA G-3'             |
| KanR-XhoI-Rev       | 5'-TGT CTC GAG TTG AAC GAT CGG GGA TCC-3'               |
| promBdAUX1F2SacI    | 5'-CTA GAG CTC TGG ACG TGG TTT TGT CCT AG-3'            |
| promBdAUX1R2SalI    | 5'-ACG CGT CGA CAT CTC TTC AAC GCG CTG TC-3'            |
| pCAMBIA-promBdAUX1F | 5'-CAT GAT TAC GAA TTC GAG CTC GTC ACT TAA TCT CGT C-3' |
| promBdAUX1seq6R     | 5'-CGA ATT TCC TCT CTG TCT CC-3'                        |
| promBdAUX1seq6F     | 5'-GGA GAC AGA GAG GAA ATT CG-3'                        |

|                     |                                                           |
|---------------------|-----------------------------------------------------------|
| genBdAUX1seq5R      | 5'-TGG AAC GAT GAG GTG CAT TG-3'                          |
| genBdAUX1seq5F      | 5'-CAA TGC ACC TCA TCG TTC CA-3'                          |
| genBdAUX1R3-pCAMBIA | 5'-GGA AAT TCG AGC TGG TCA CCT AGC AAG CAT TAC TGG GTT-3' |
| BdAUX1p-XmaI F      | 5'-GCG ACT GTG CCA ACA CCC-3'                             |
| BdAUX1p-sGFP R      | 5'-GCC CTT GCT CAC CAT CTC TTC AAC GCG CTG TCC TC-3'      |
| sGFP(S65T) F        | 5'-ATG GTG AGC AAG GGC GAG G-3'                           |
| sGFP+linker R       | 5'-ATC CTC TAG AGT CGA CCT TGT ACA GCT CGT CCA TGC-3'     |
| sGFPlink-AUX1g F    | 5'-GTC GAC TCT AGA GGA TCC ATG GTG CCG CGC GAG CAT-3'     |
| AUX1g-PacI-pCAM R   | 5'-TTT TTC CTC GGG TTA GTT AAT TAA TTC-3'                 |
